# Supplementary material for: Genetic structure of Vaccinium vitis-idaea in lowland cool spot and alpine populations: microrefugia of alpine plants in the midlatitudes
Source: Springer Nature journal article supplement (doi:10.1007/s00035-016-0169-3), 2016-06-18

Genetic structure of *Vaccinium vitis-idaea* in lowland cool spot and alpine populations: Microrefugia of alpine plants in the mid-latitudes

Ayuma Shimokawabe, Yuichi Yamaura*, Masanao Sueyoshi, Gaku Kudo, and Futoshi Nakamura

*Corresponding author:

Department of Forest Vegetation, Forestry and Forest Products Research Institute, Tsukuba, Ibaraki, Japan

E-mail: [yamaua@ffpri.affrc.go.jp](mailto:yamaua@ffpri.affrc.go.jp)

Appendix A. Locus name, repeat motif, allele size range, and number of alleles for each microsatellite marker

| Locus | Repeat motif | Size range (bp) | Number of alleles |
| --- | --- | --- | --- |
| NA741 | (TC)9 | 302–356 | 23 |
| NA800 | (TC)13 | 202–246 | 20 |
| NA1040 | (TC)11 | 188–226 | 17 |
| CA169F | (GAT)4 | 109–127 | 5 |
| VCC_I2 | (CT)14 | 205–247 | 17 |
| VCC_K4 | (TC)16(TC)12 | 190–268 | 31 |
| CA236F | (TG)17 | 219–251 | 12 |

Appendix B. Distributions of *Vaccinium* *vitis-idaea* ramets and genets in the wind-hole and high mountain sites. Each number indicates the locations of ramets. The same number indicates genets identified as the same genotype based on seven microsatellite loci.


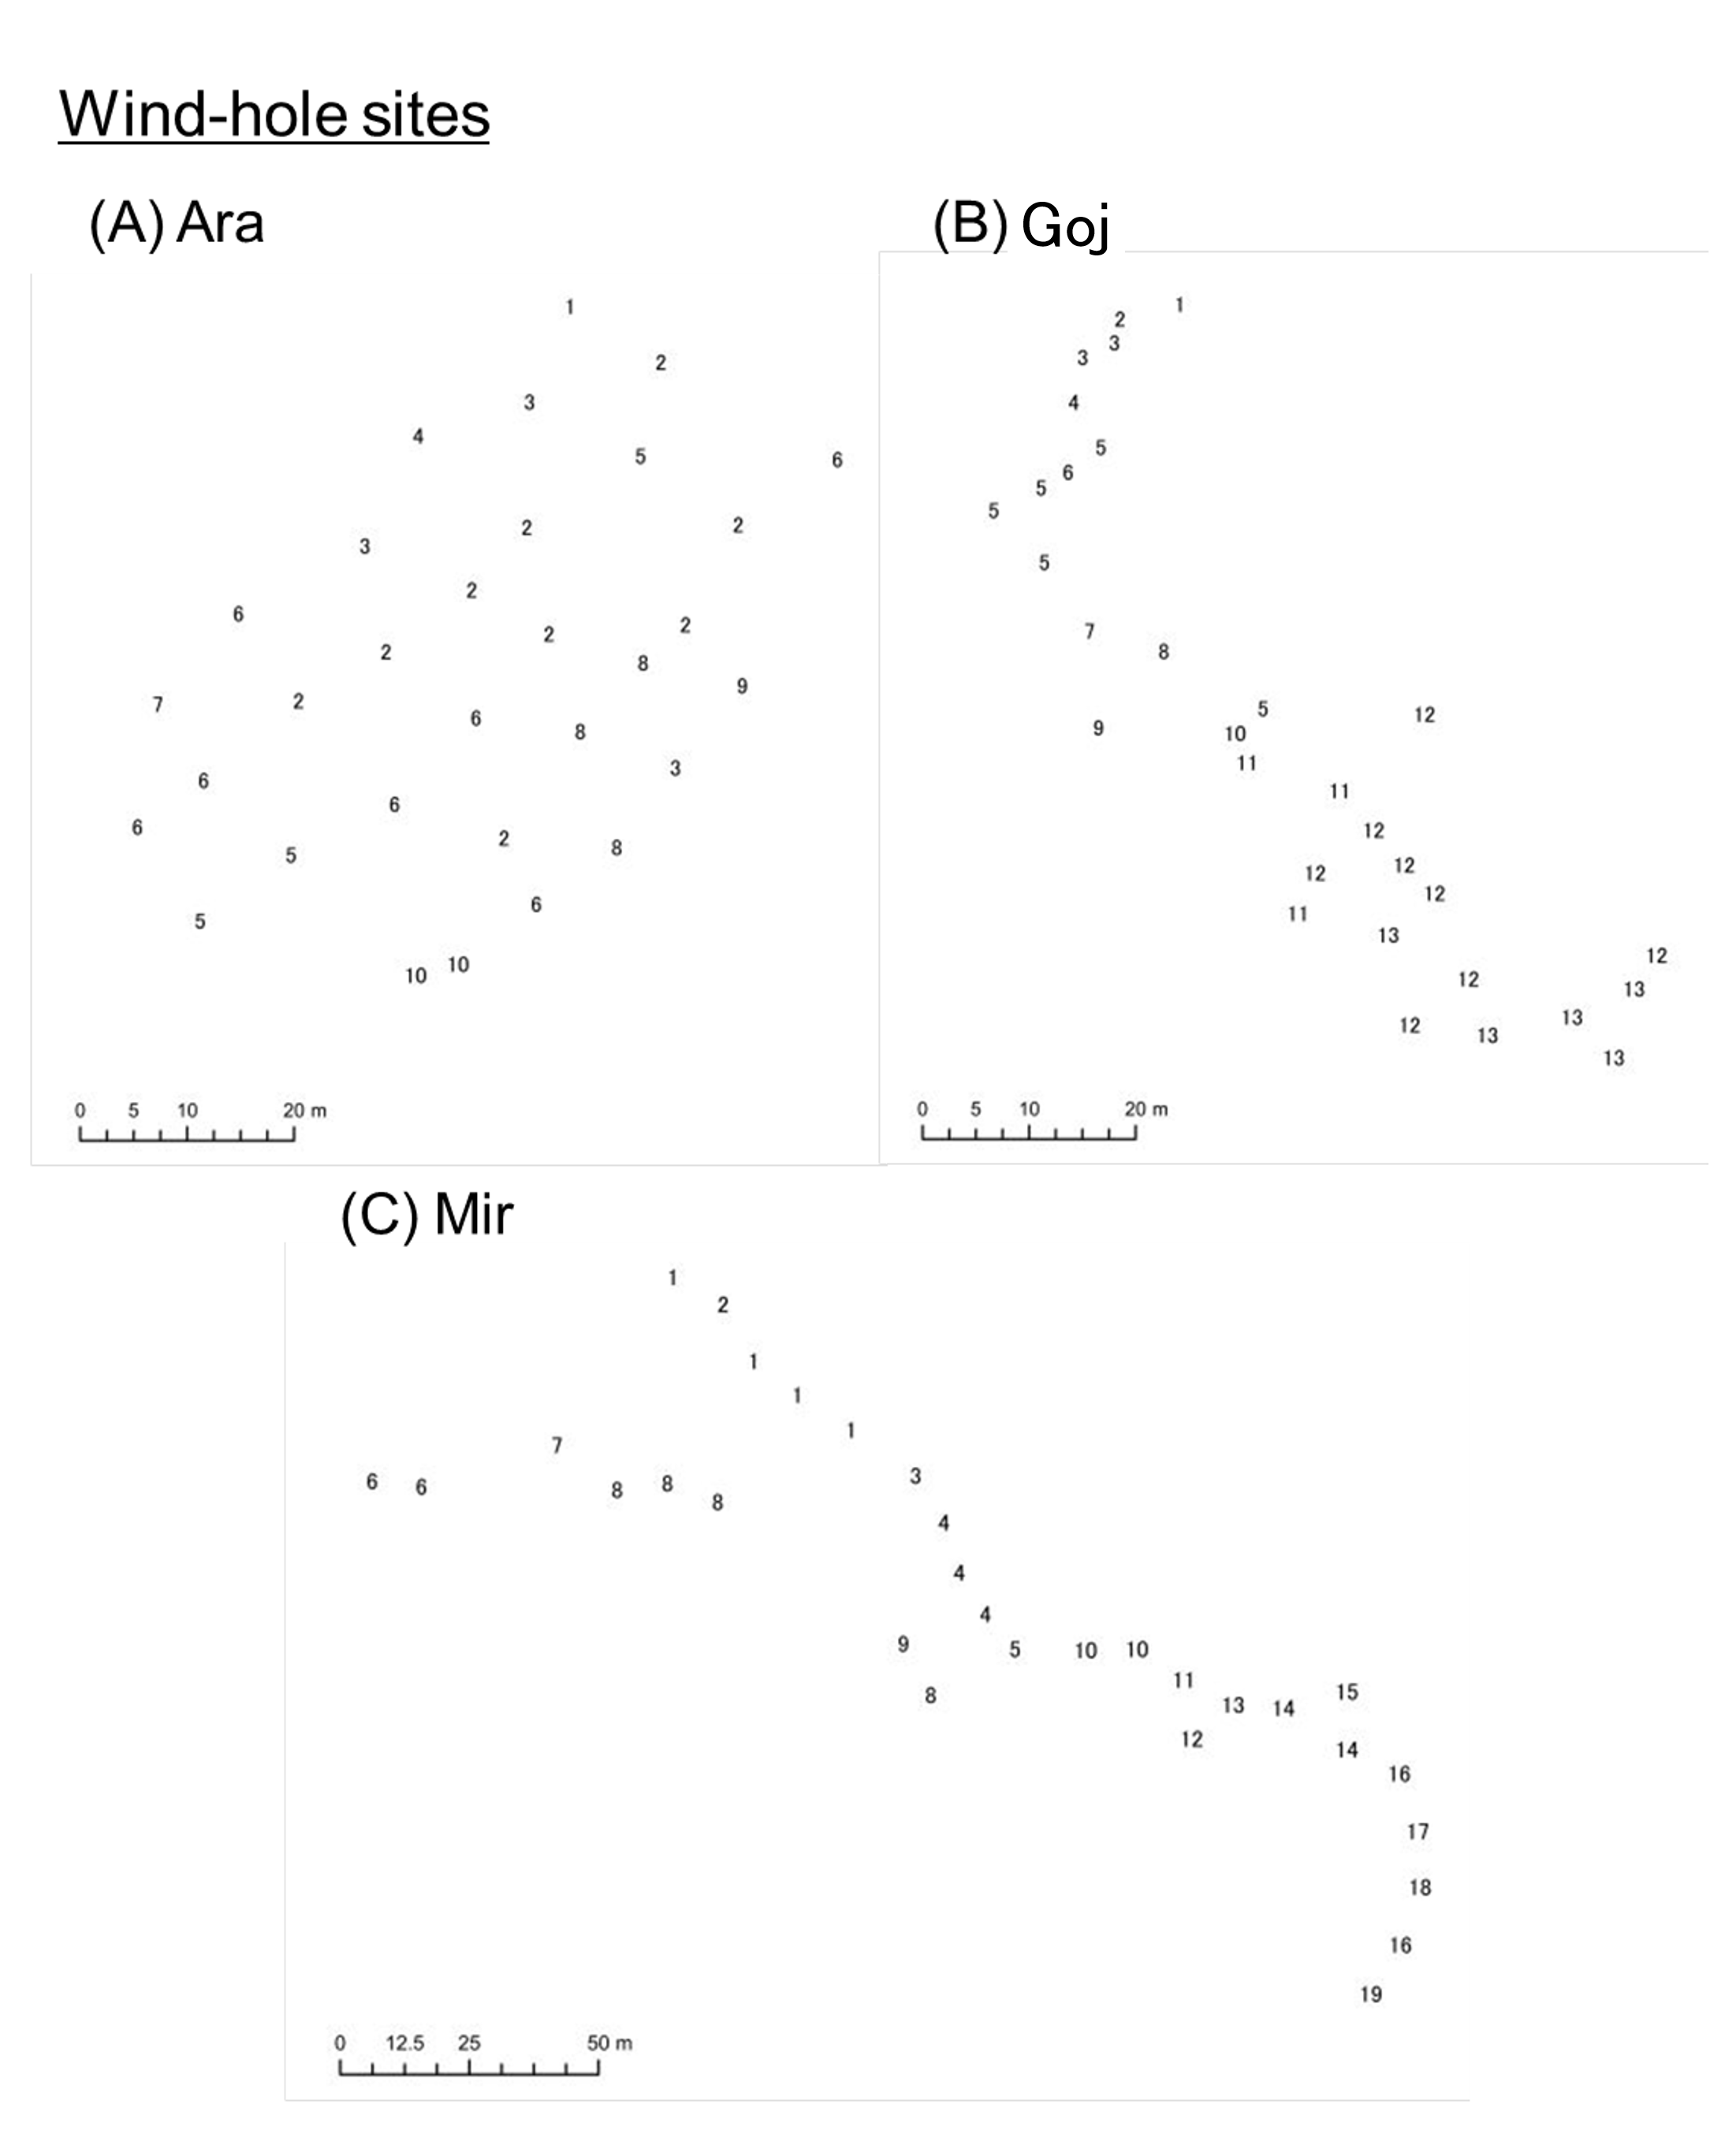

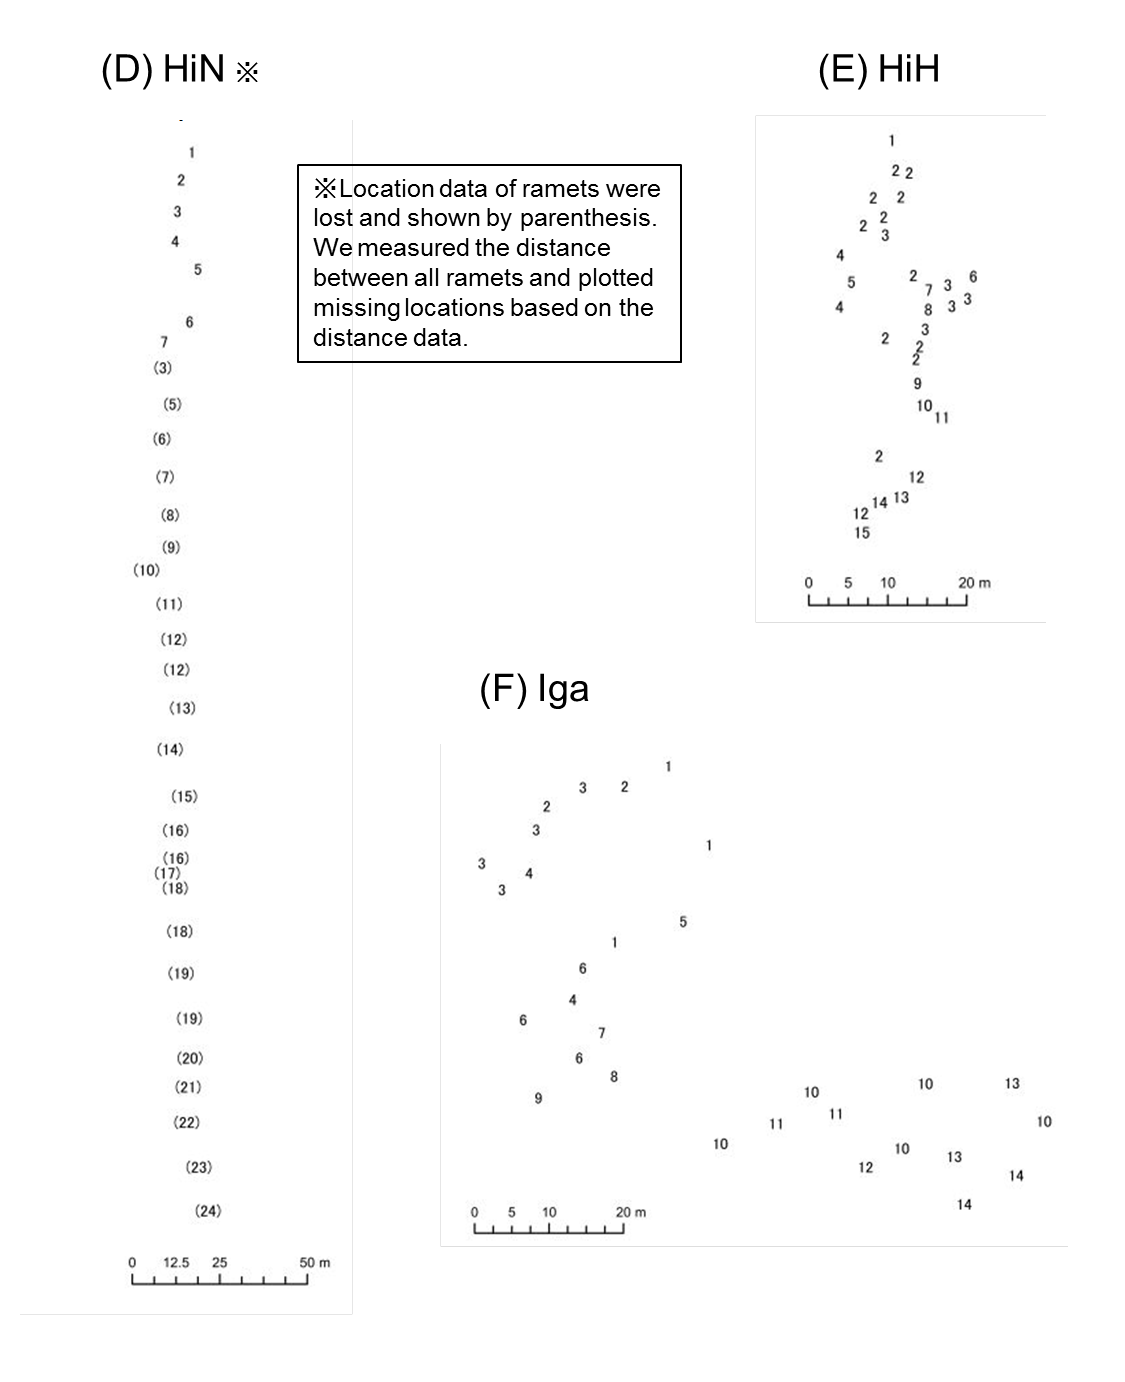


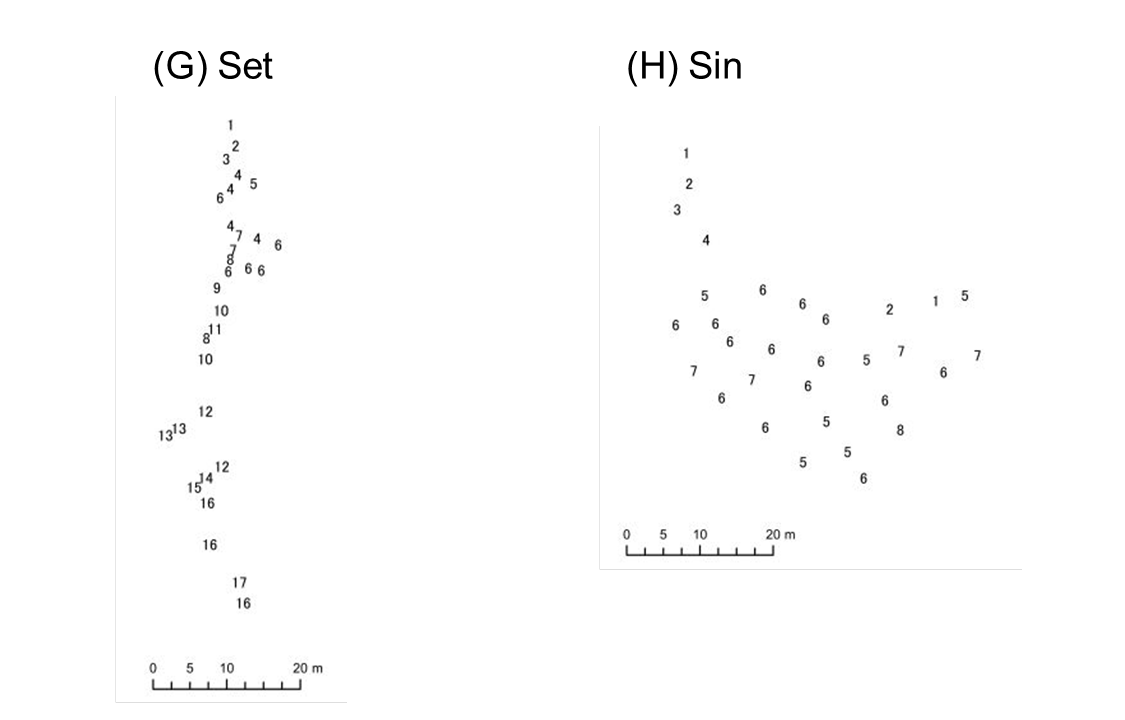


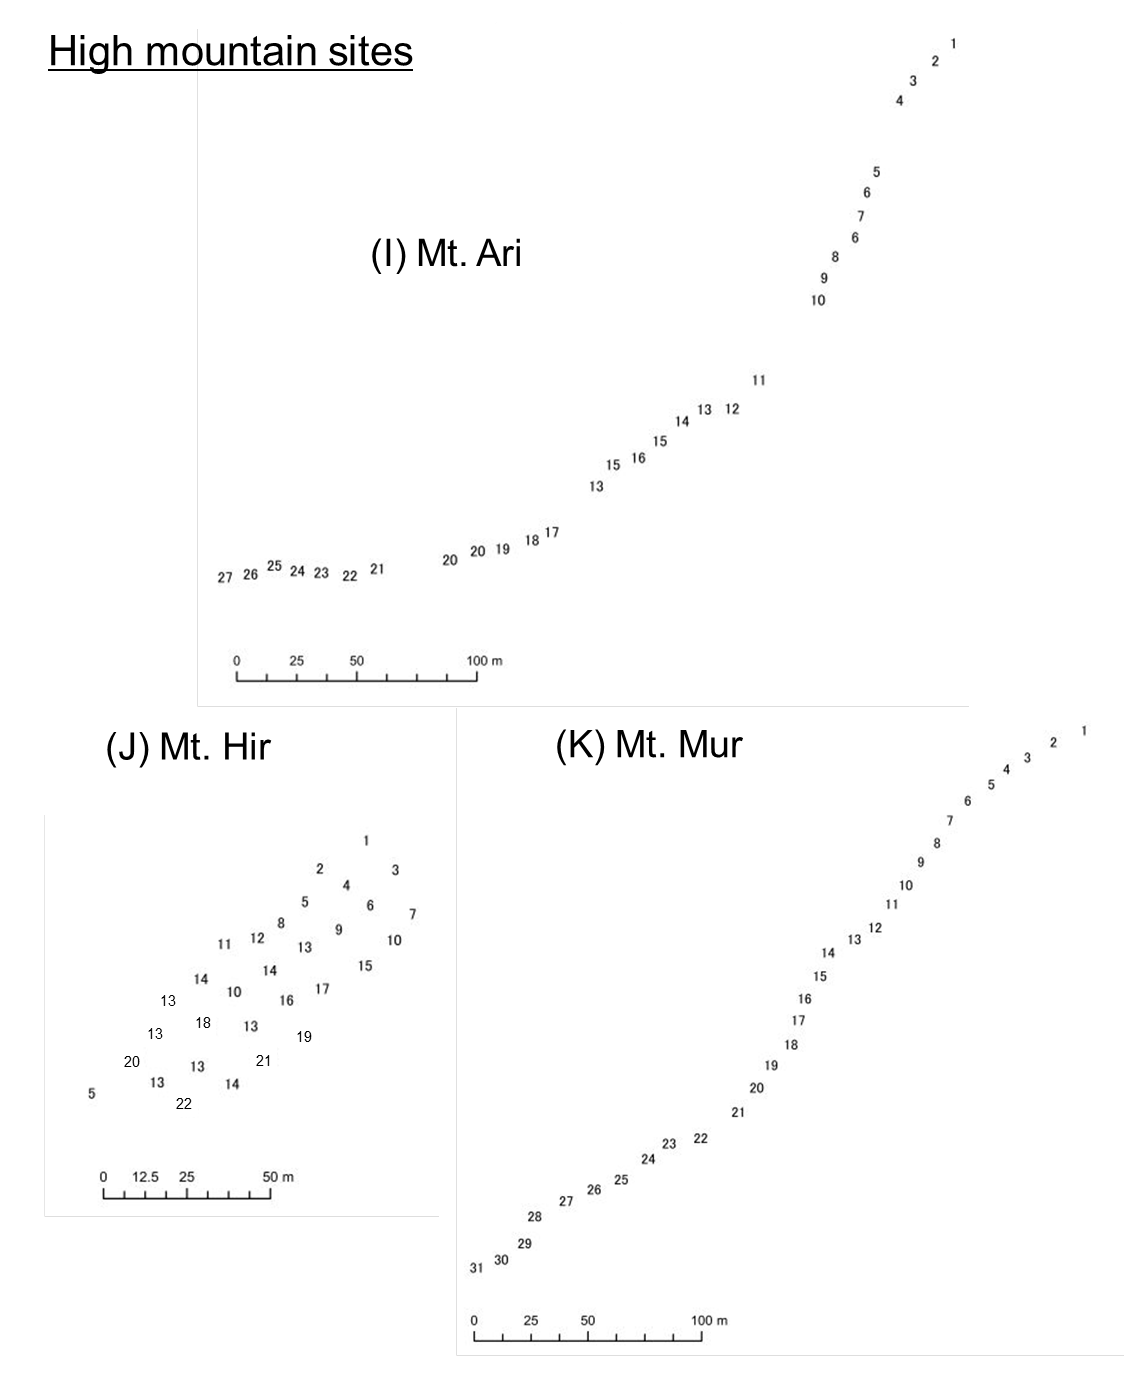


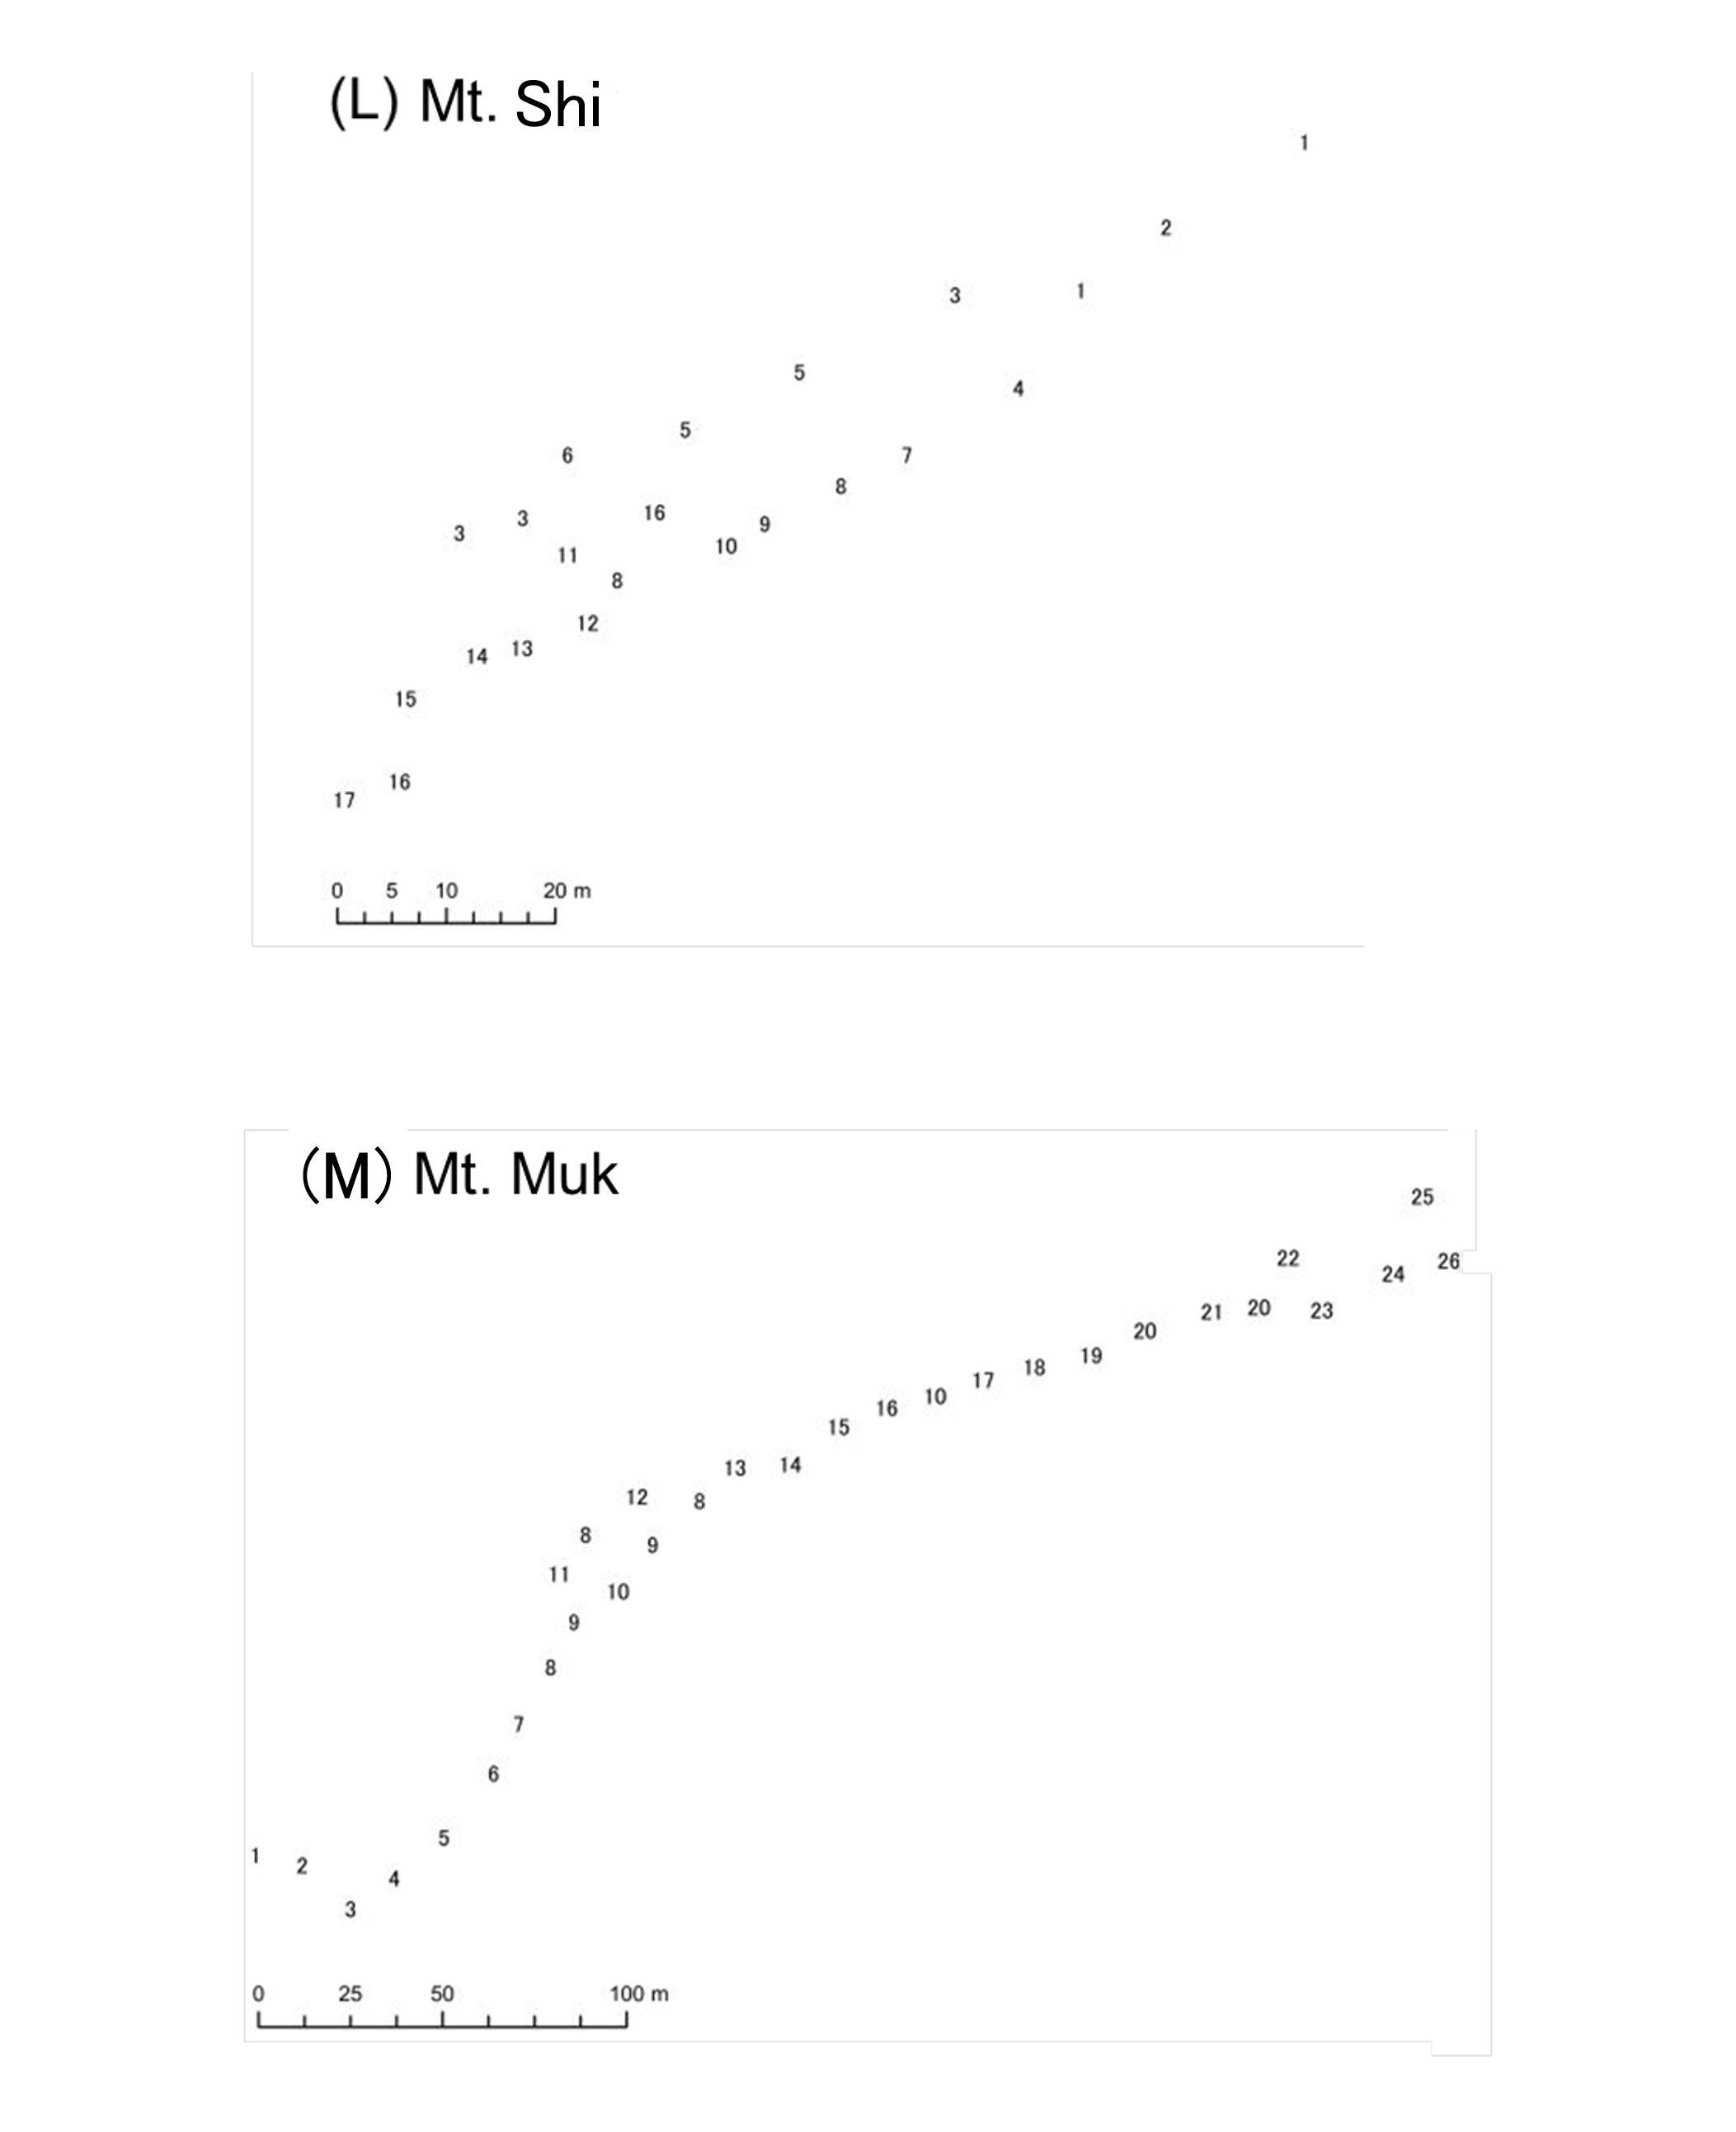

Supplement: MOESM1 [file 35_2016_169_MOESM1_ESM.docx]
